# Supplementary material
Source: PubMed Central journal article supplement (PMC7227046)
Supplement: ao0c01090_si_001.pdf [file ao0c01090_si_001.pdf]

## Supporting Information

### Amphiphilic Rhenium-Oxo Corroles as a New Class of Sensitizers for Photodynamic Therapy

Rune F. Einrem,<sup>a</sup> Abraham B. Alemayehu,<sup>a</sup> Sergey M. Borisov,<sup>\*,b</sup>

Abhik Ghosh<sup>\*,a</sup> and Odrun A. Gederaas<sup>\*,c</sup>

<sup>a</sup> Department of Chemistry, UiT – The Arctic University of Norway, N-9037 Tromsø, Norway

<sup>b</sup> Institute of Analytical Chemistry and Food Chemistry, Graz University of Technology, Stremayrgasse 9, 8010 Graz, Austria

<sup>c</sup> Department of Clinical and Molecular Medicine and Department of Physics, Norwegian University of Science and Technology, NTNU, N-7491 Trondheim, Norway

\* Correspondence: sergey.borisov@tugraz.at (SMB), abhik.ghosh@uit.no (AG), odrun.gederaas@ntnu.no (OAG)

| <b>Content</b>                | <b>Page</b> |
|-------------------------------|-------------|
| A. UV-vis spectra             | 2           |
| B. Phosphorescence decays     | 4           |
| C. Singlet oxygen assays      | 7           |
| D. <sup>1</sup> H NMR spectra | 8           |
| E. ESI mass spectra           | 10          |
| F. FT-IR spectra              | 12          |

### A. UV-vis spectra

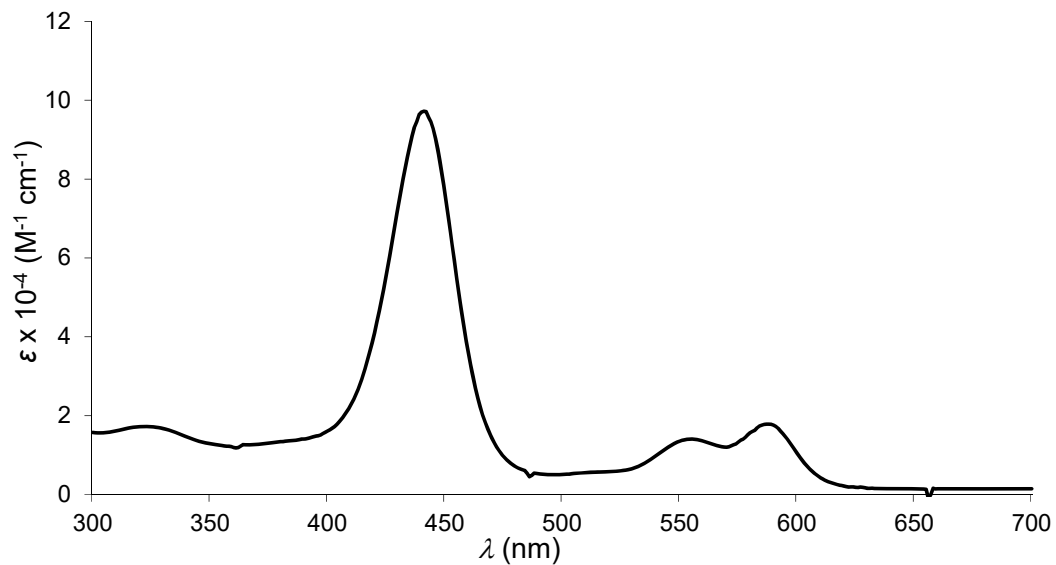

**Figure S1.** UV-vis spectrum in DCM of  $\text{Re}[\text{TpCO}_2\text{CH}_3\text{PC}](\text{O})$ .

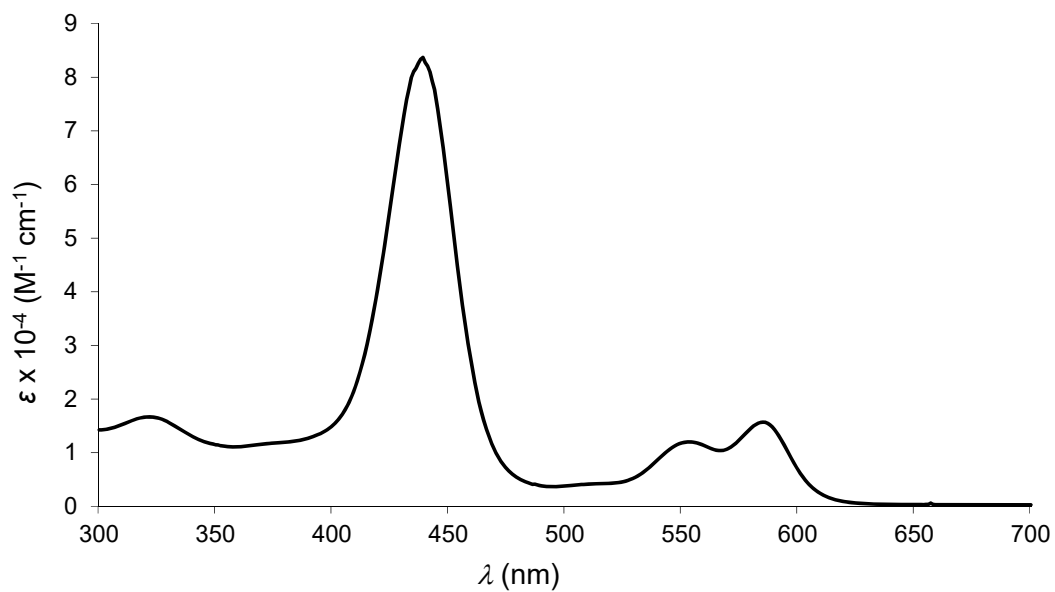

**Figure S2.** UV-vis spectrum in DCM of  $\text{Re}[\text{TmCO}_2\text{CH}_3\text{PC}](\text{O})$ .

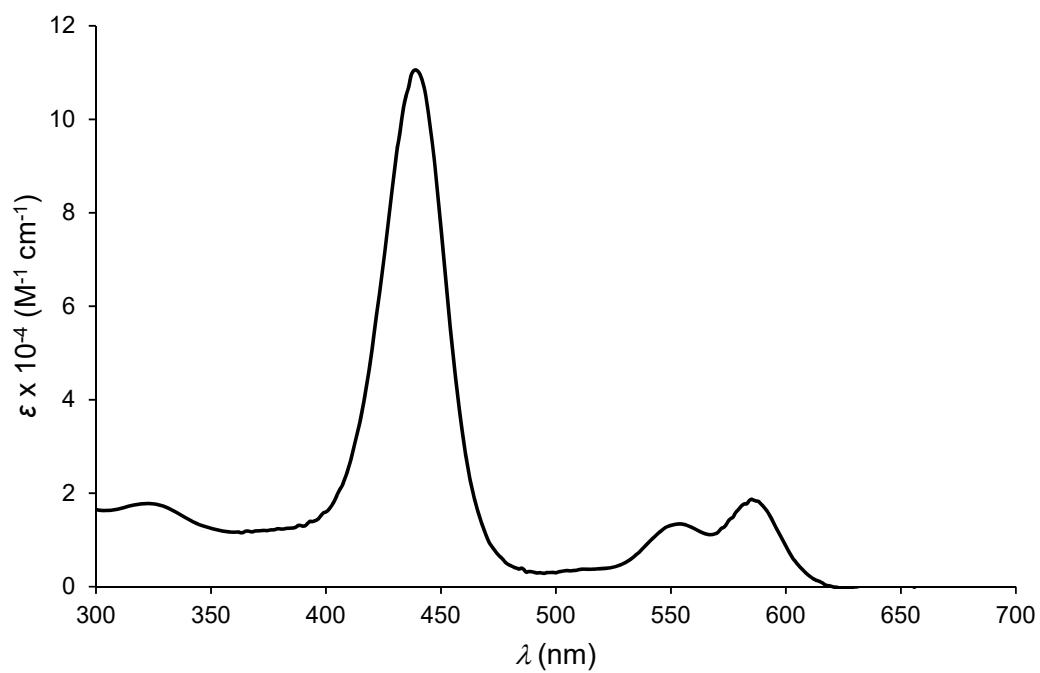

**Figure S3.** UV-vis spectrum in DCM of  $\text{Re}[p\text{TCPC}](\text{O})$ .

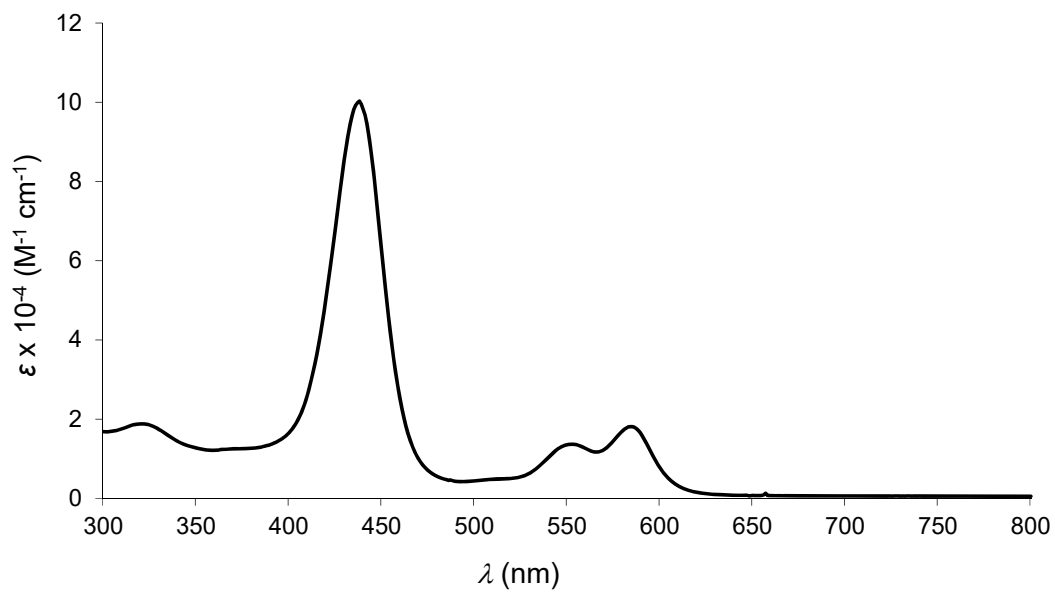

**Figure S4.** UV-vis spectrum in DCM of  $\text{Re}[m\text{TCPC}](\text{O})$ .

## B. Phosphorescence decays

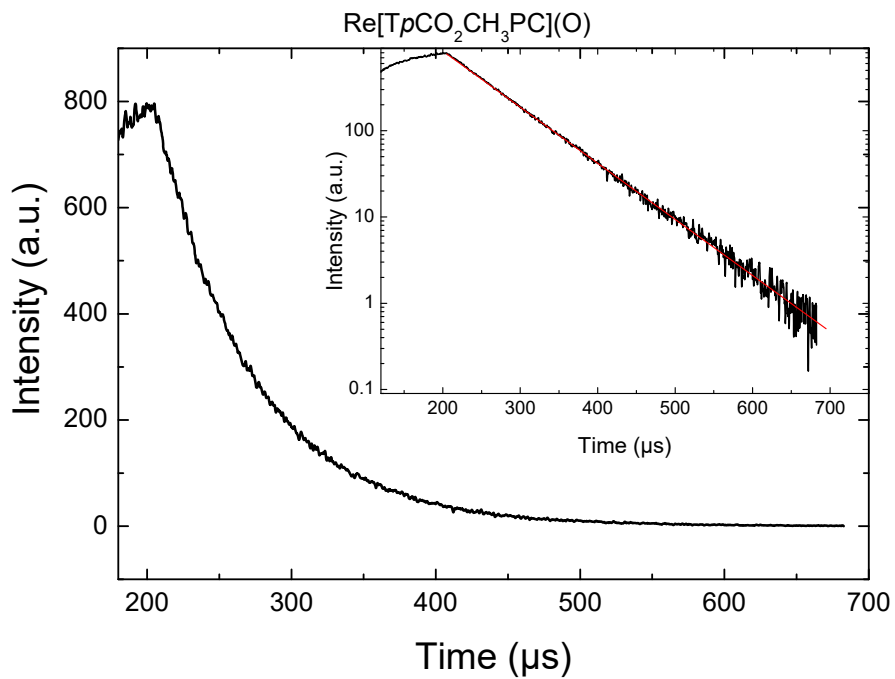

**Figure S5.** Phosphorescence decay of  $\text{Re}[\text{TpCO}_2\text{CH}_3\text{PC}](\text{O})$  in anoxic toluene. The inset shows the logarithmic plot.

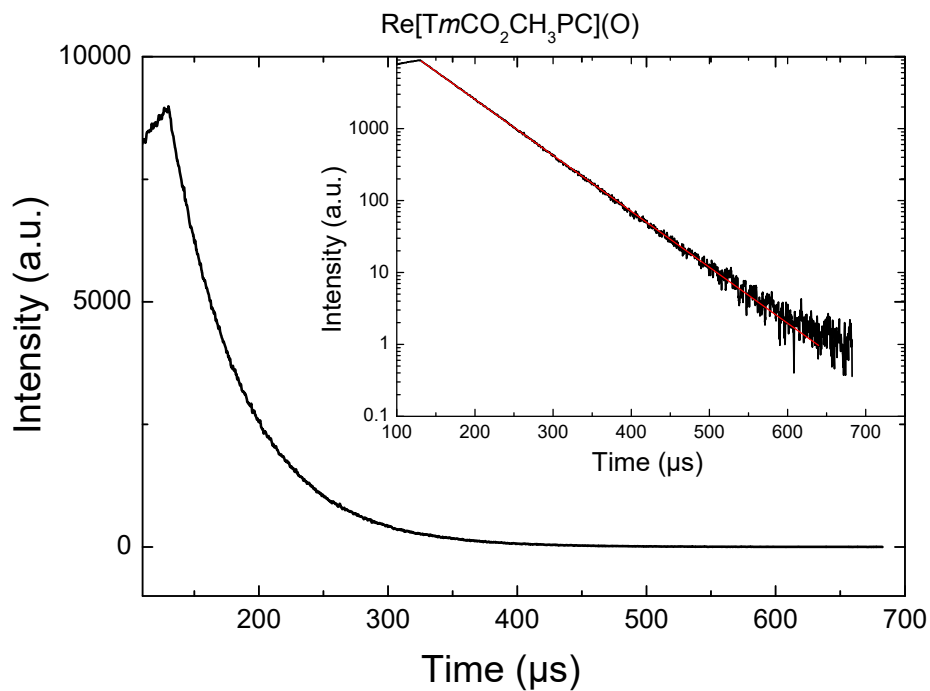

**Figure S6.** Phosphorescence decay of  $\text{Re}[\text{TmCO}_2\text{CH}_3\text{PC}](\text{O})$  in anoxic toluene. The inset shows the logarithmic plot.

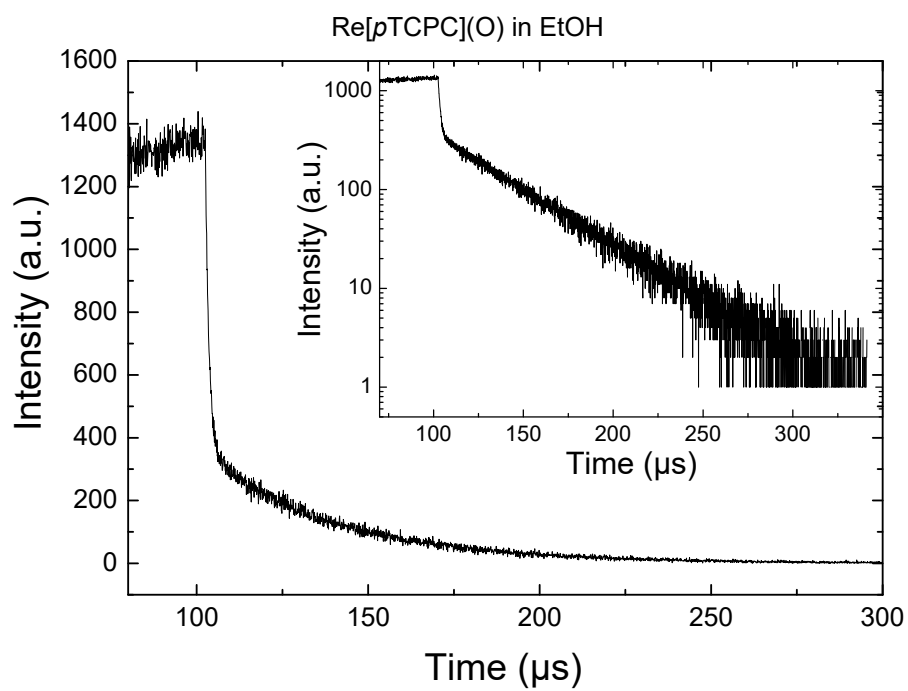

**Figure S7.** Phosphorescence decay of Re[pTCPC](O) in anoxic ethanol. The inset shows the logarithmic plot.

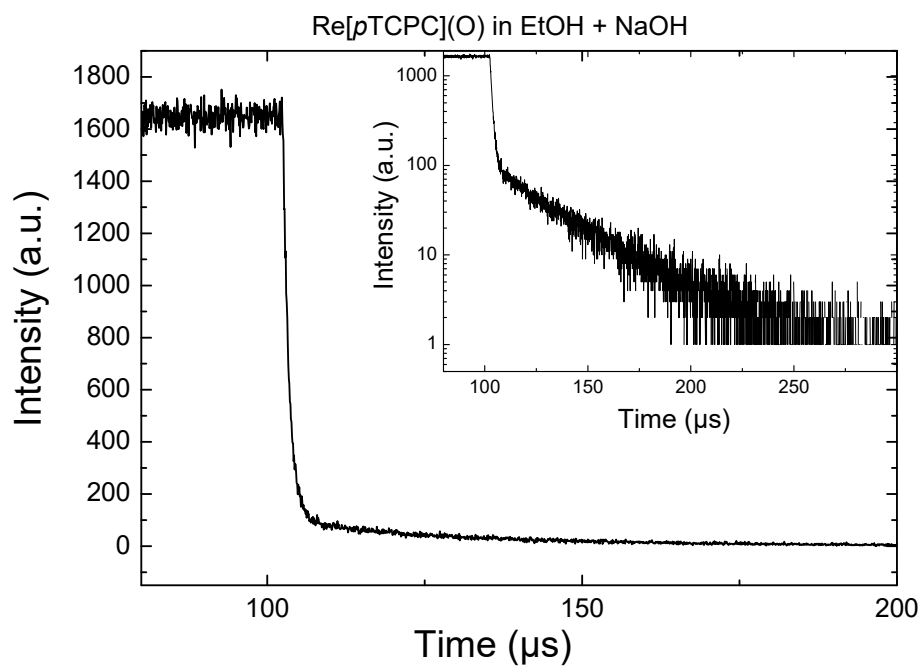

**Figure S8.** Phosphorescence decay of Re[pTCPC](O) in anoxic ethanol with added NaOH ( $3 \cdot 10^{-3}$  M). The inset shows the logarithmic plot.

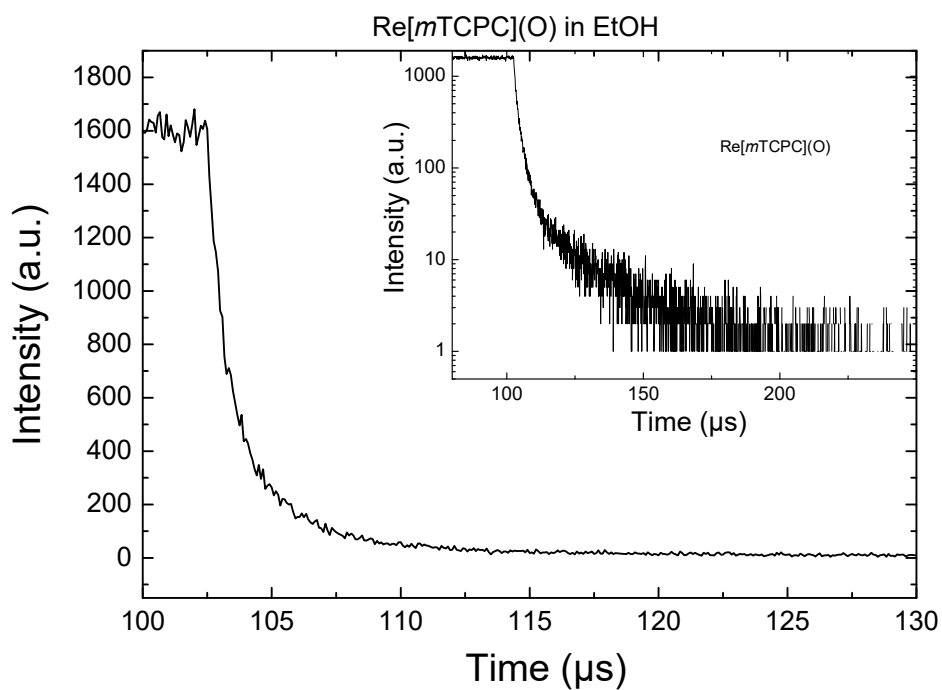

**Figure S9.** Phosphorescence decay of Re[mTCPC](O) in anoxic ethanol. The inset shows the logarithmic plot.

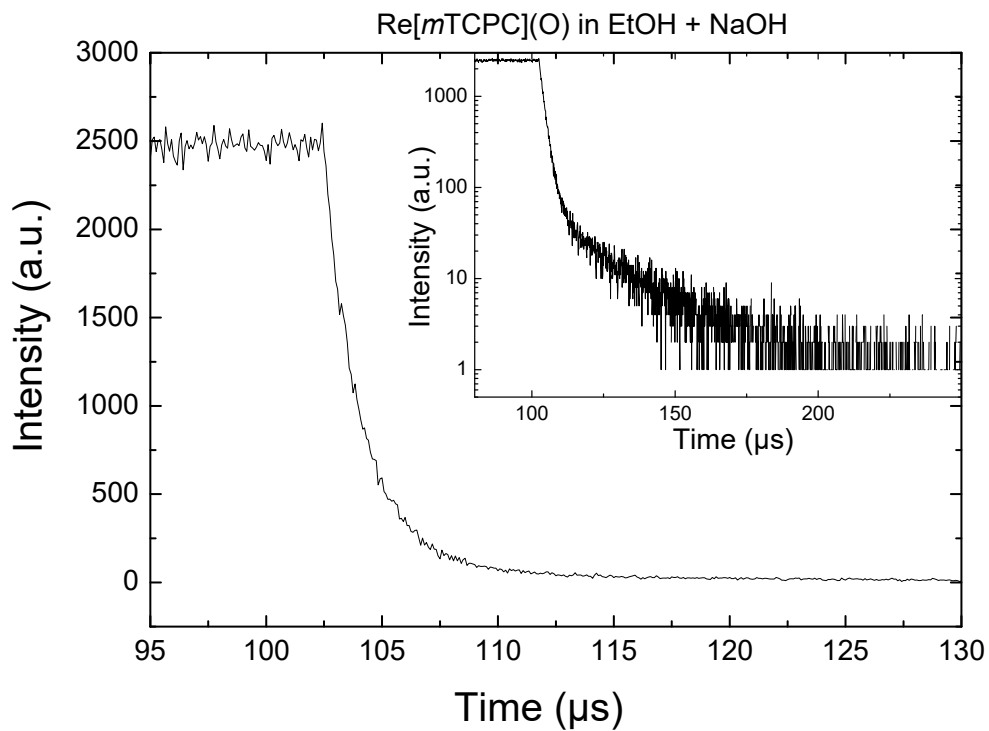

**Figure S10.** Phosphorescence decay of Re[mTCPC](O) in anoxic ethanol with added NaOH ( $3 \cdot 10^{-3}$  M). The inset shows the logarithmic plot.

### C. Singlet oxygen assay

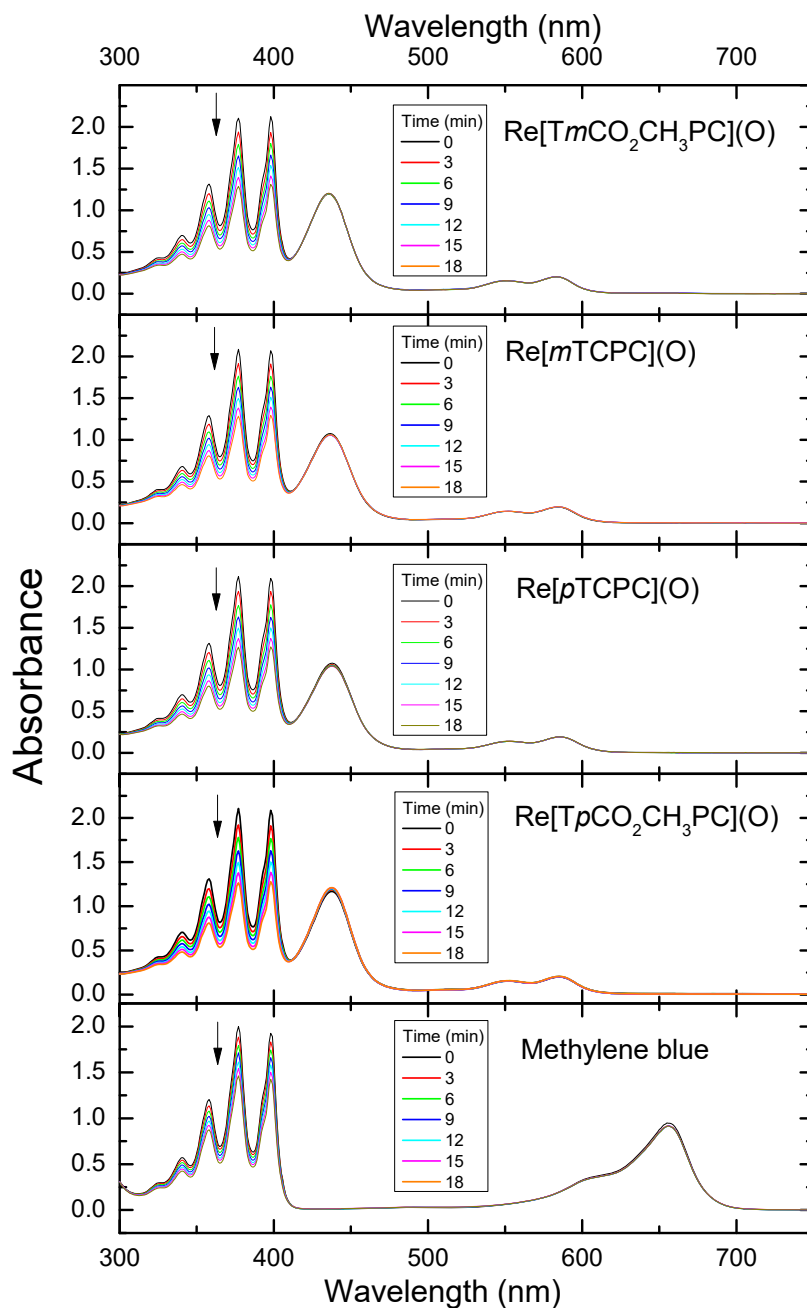

**Figure S11.** UV-vis spectra of air-saturated solutions containing 9,10-dimethylantracene and a sensitizer upon irradiation with  $595\pm 5$  nm light.

D.  $^1\text{H}$  NMR spectra

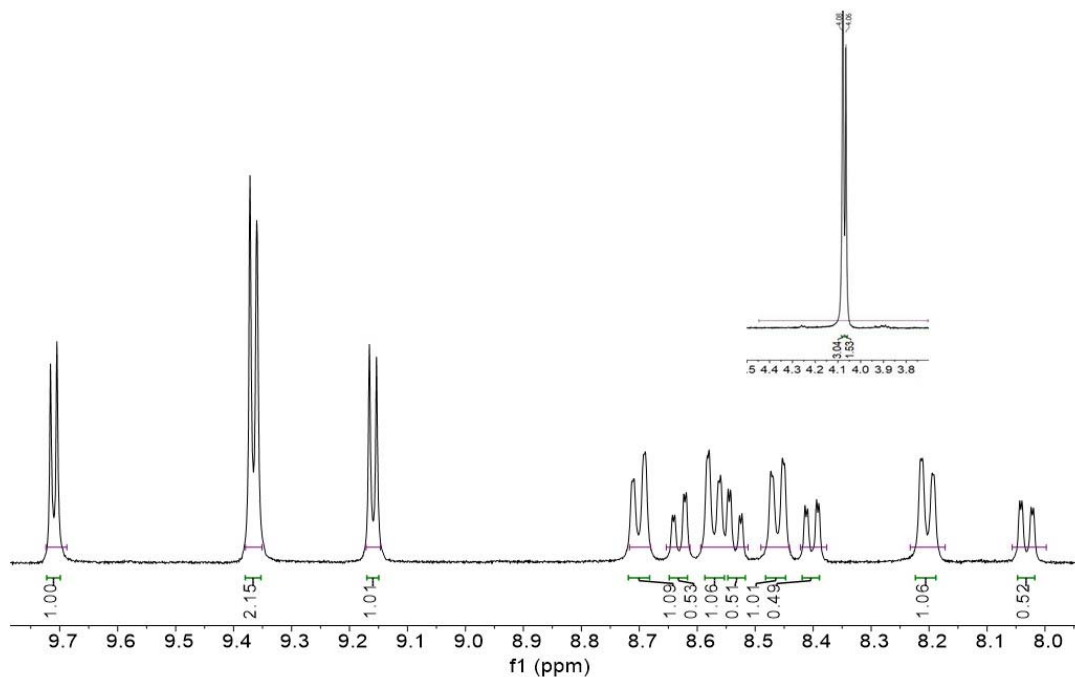

Figure S12.  $^1\text{H}$  NMR (400 Hz,  $\text{CD}_2\text{Cl}_2$ ,  $-20^\circ\text{C}$ ) spectrum of  $\text{Re}[\text{TpCO}_2\text{CH}_3\text{PC}](\text{O})$ .

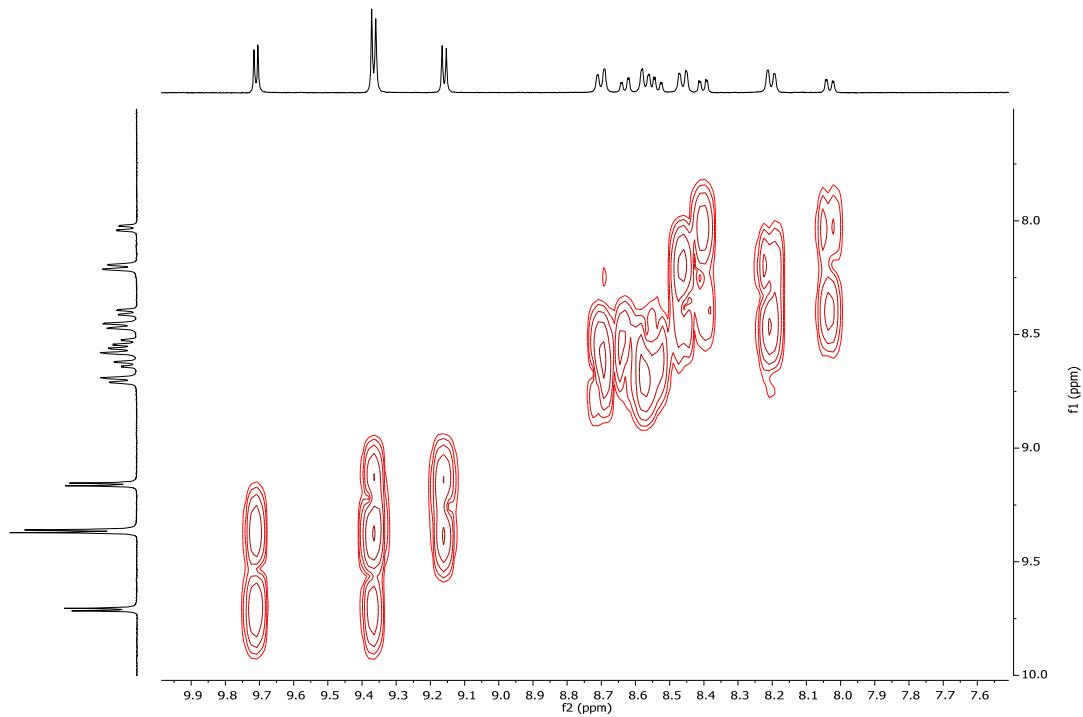

Figure S13. COSY (400Hz  $\text{CD}_2\text{Cl}_2$ ,  $-20^\circ\text{C}$ ) of  $\text{Re}[\text{TpCO}_2\text{CH}_3\text{PC}](\text{O})$ .



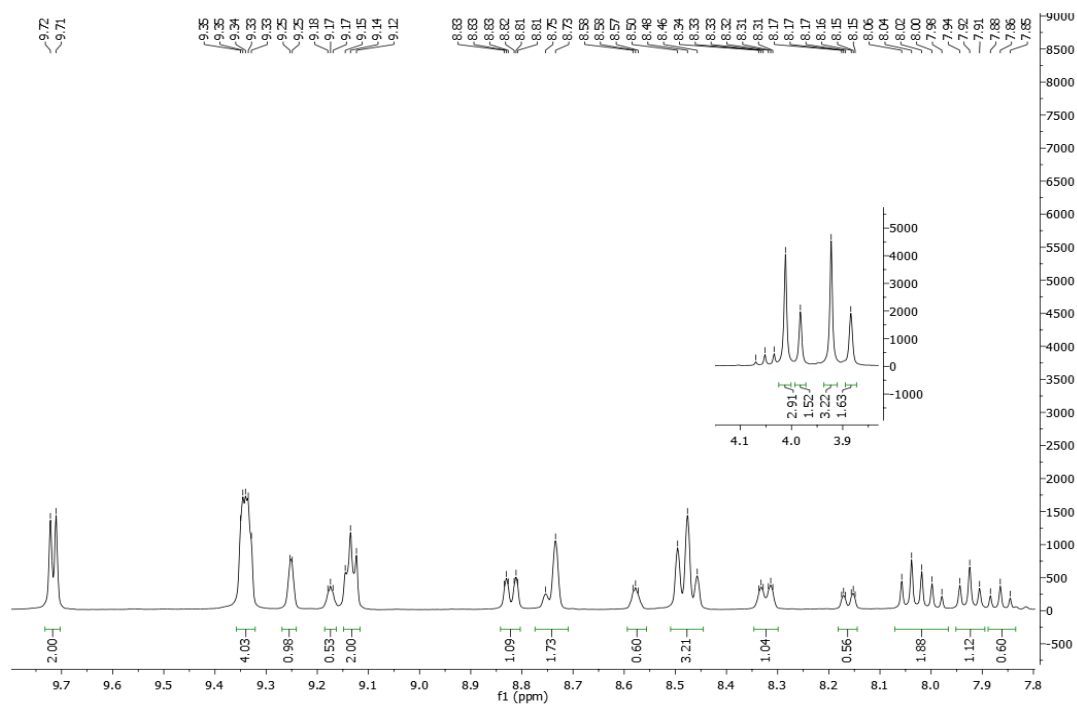

Figure S14.  $^1\text{H}$  NMR (400 Hz,  $\text{CD}_2\text{Cl}_2$ ,  $-20^\circ\text{C}$ ) spectrum of  $\text{Re}[\text{TmCO}_2\text{CH}_3\text{PC}](\text{O})$ .

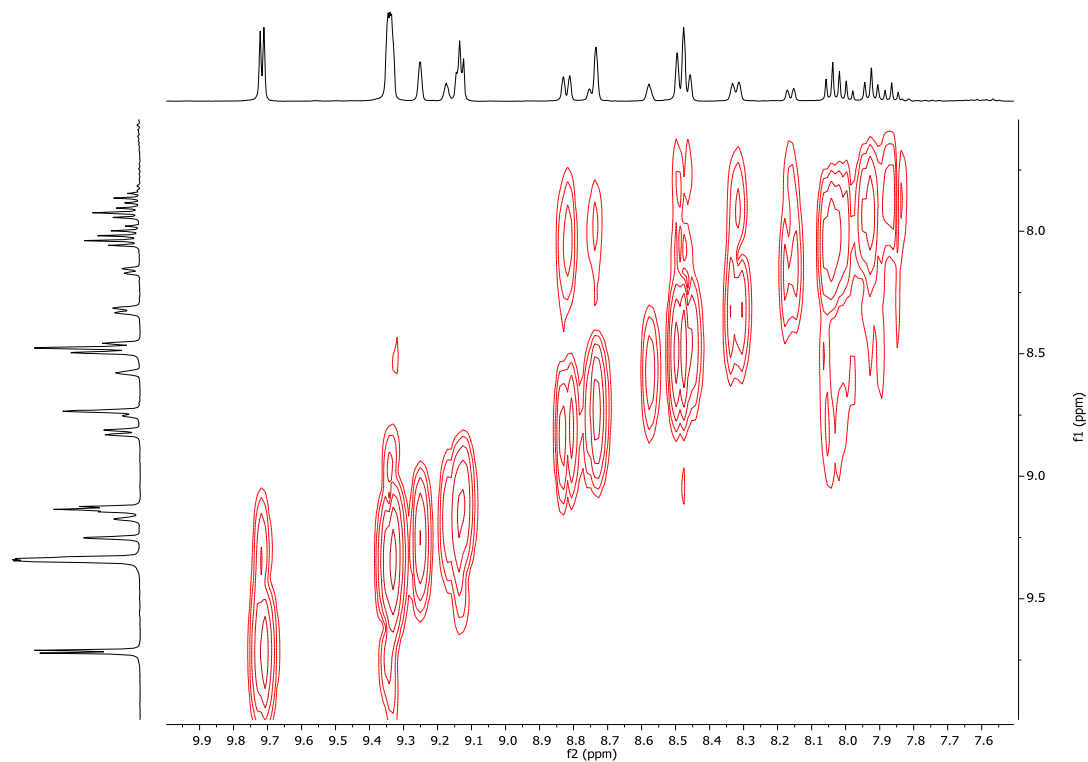

Figure S15. COSY (400Hz,  $\text{CD}_2\text{Cl}_2$ ,  $-20^\circ\text{C}$ ) of  $\text{Re}[\text{TmCO}_2\text{CH}_3\text{PC}](\text{O})$ .

## E. ESI mass spectra

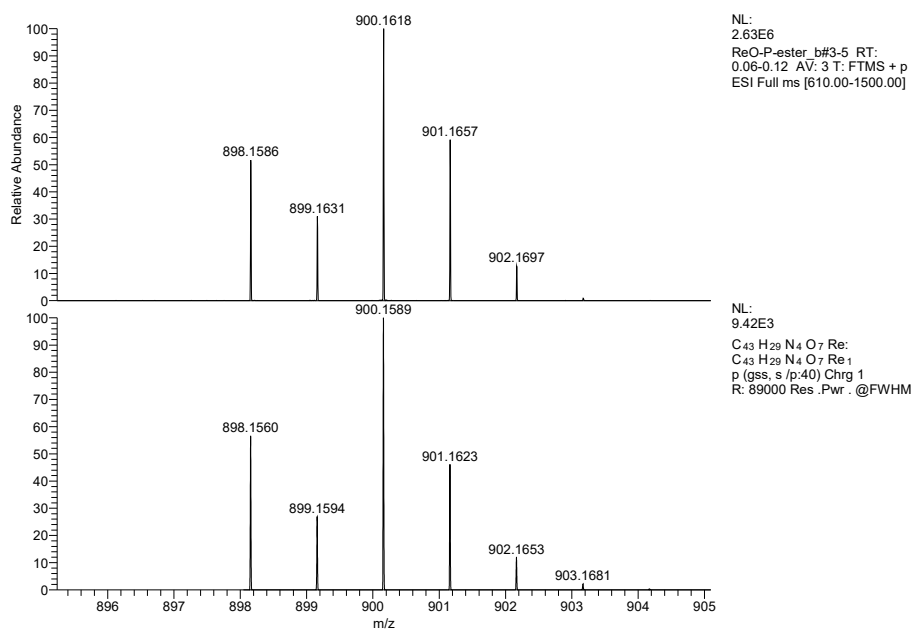

**Figure S16.** ESI-MS of Re[*TP*CO<sub>2</sub>CH<sub>3</sub>PC](O).

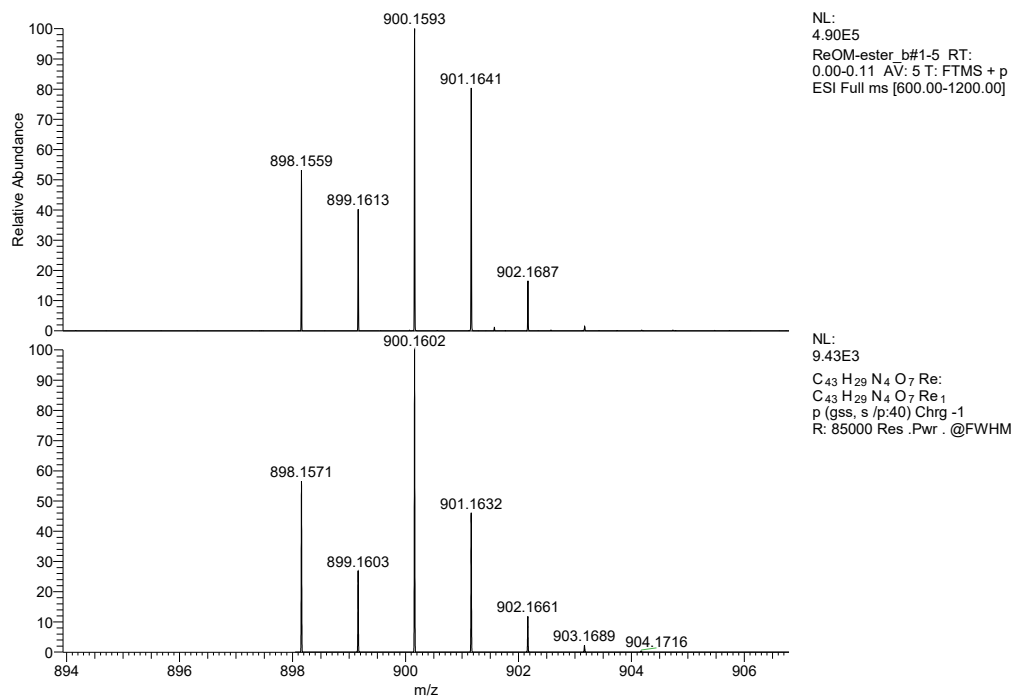

**Figure 17.** ESI-MS of Re[*Tm*CO<sub>2</sub>CH<sub>3</sub>PC](O).

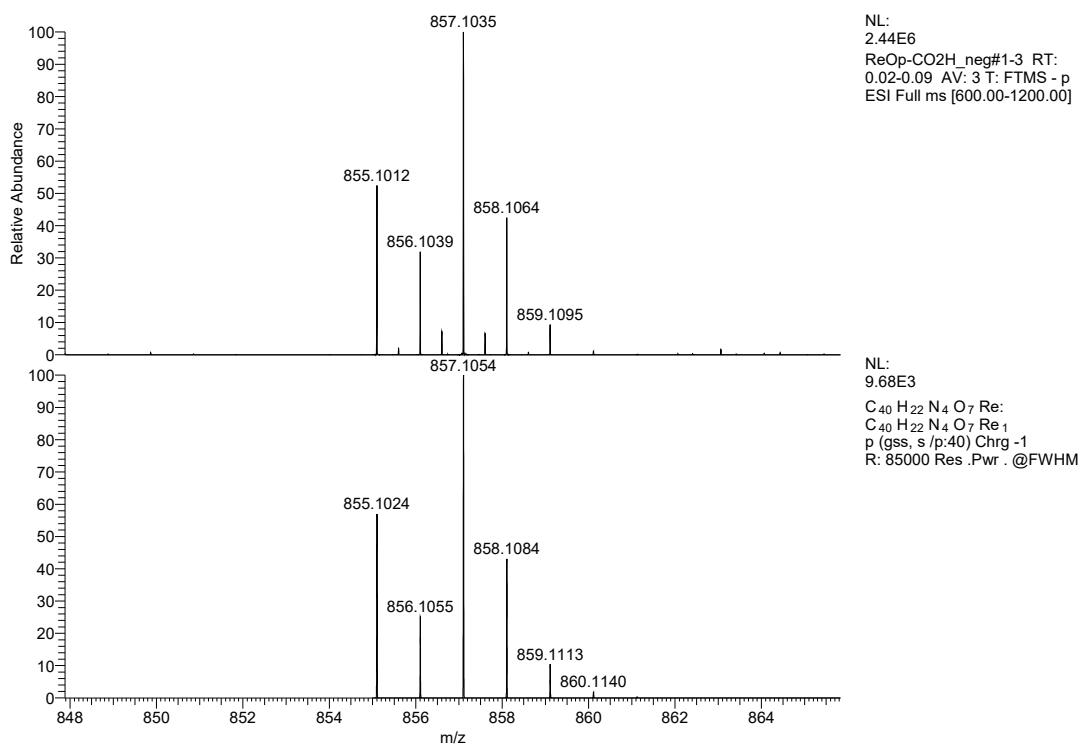

Figure S18. ESI-MS of Re[pTCPC](O).

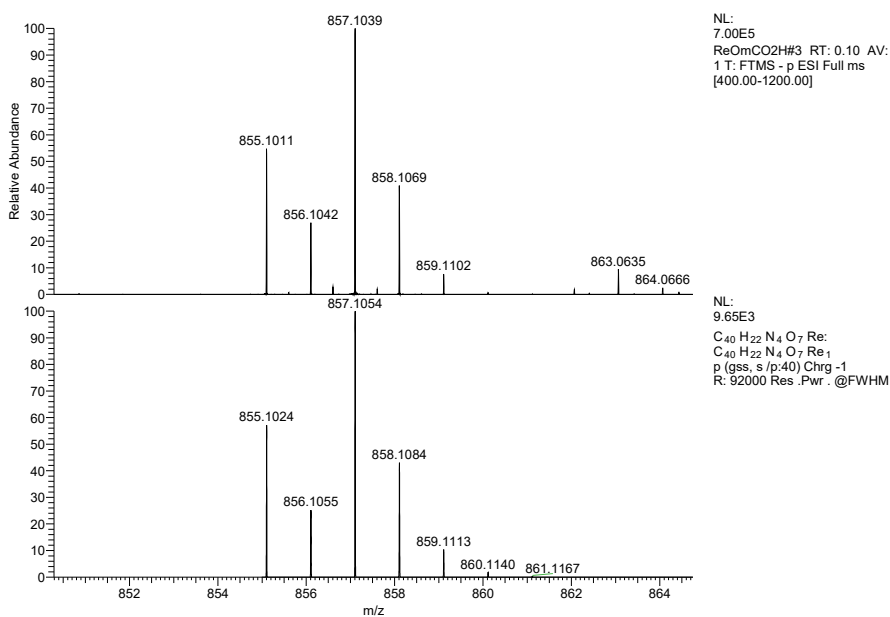

Figure S19. ESI-MS of Re[mTCPC](O).

## F. FT-IR spectra

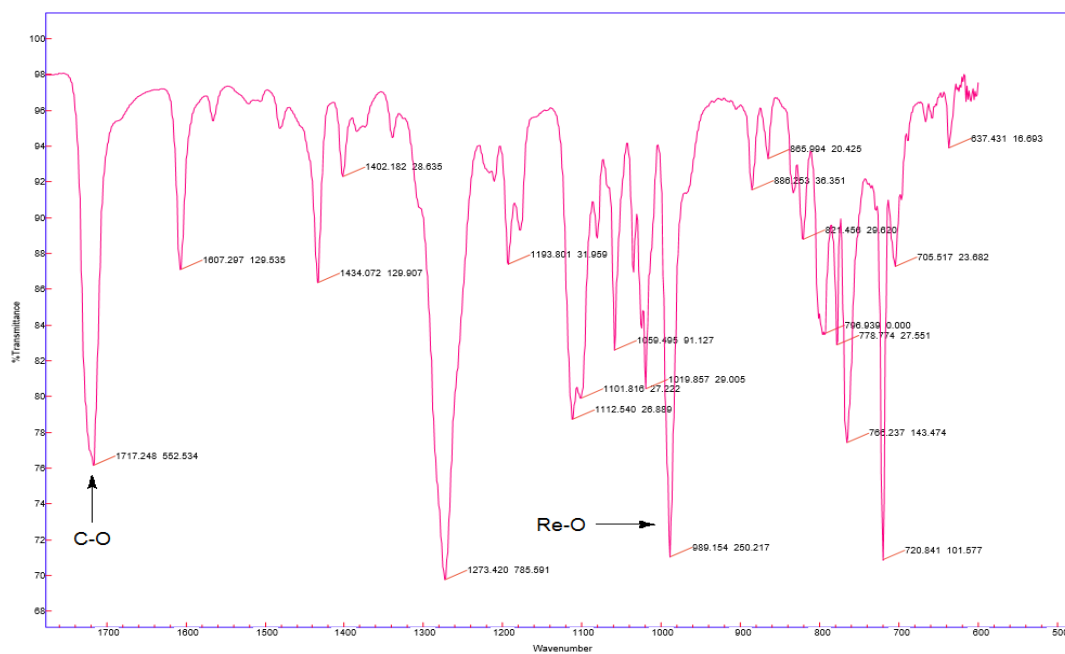

Figure S20. IR spectrum of  $\text{Re}[\text{TpCO}_2\text{CH}_3\text{PC}](\text{O})$ .

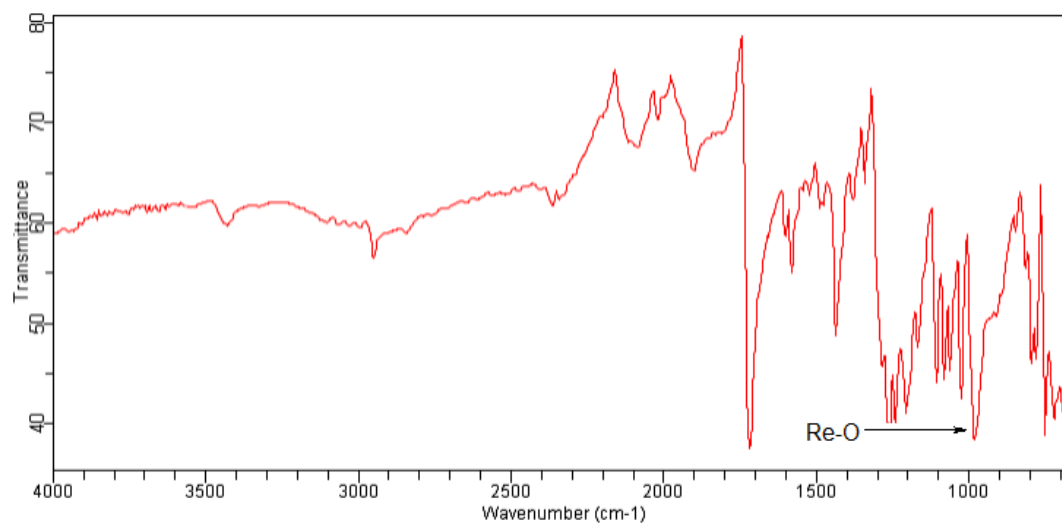

Figure S21. IR spectrum of  $\text{Re}[\text{TmCO}_2\text{CH}_3\text{PC}](\text{O})$ .

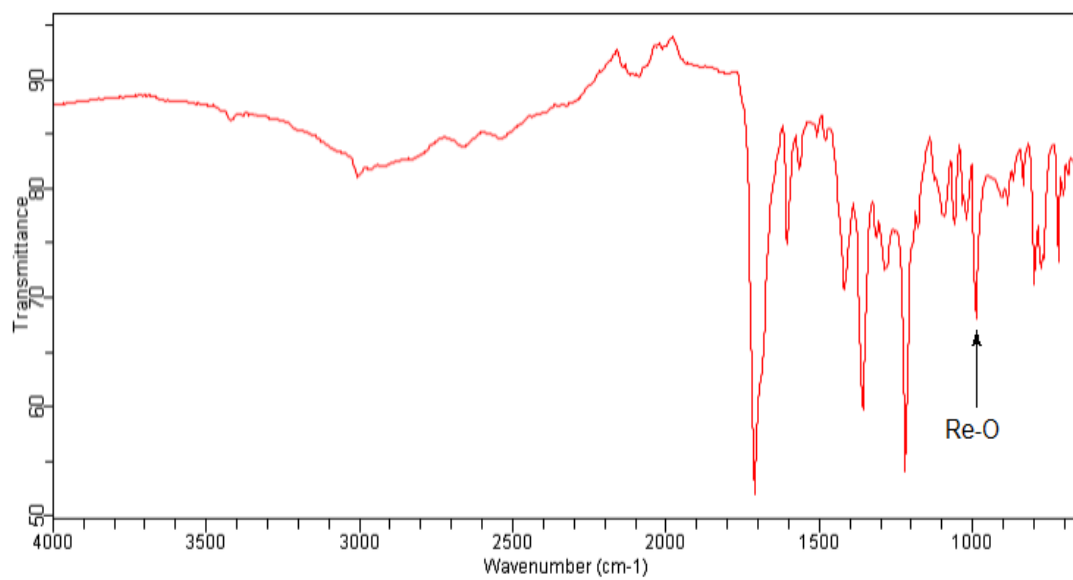

**Figure S22.** IR spectrum of Re[pTCPC](O).

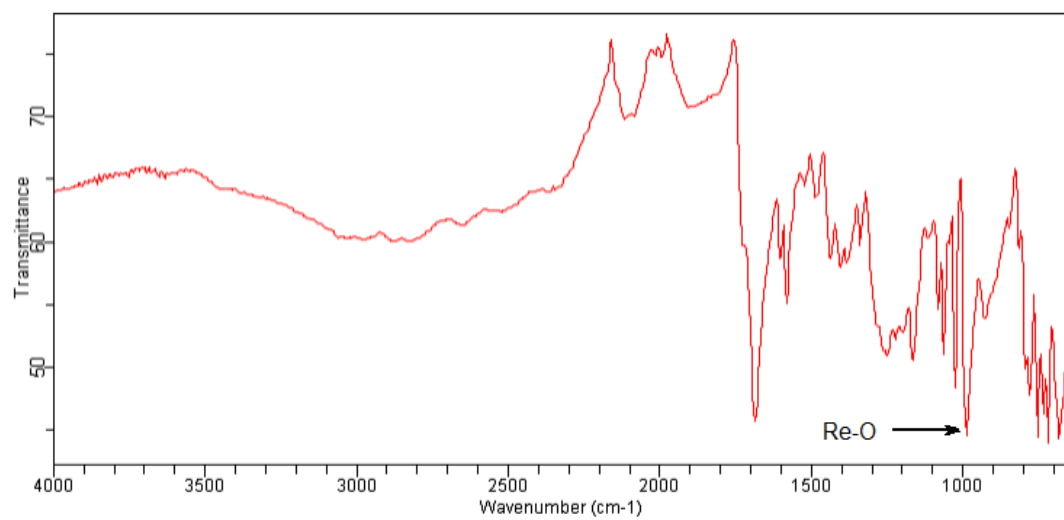

**Figure S23.** IR spectrum of Re[mTCPC](O).
